# Supplementary material
Source: Royal Society of Chemistry journal article supplement (doi:10.1039/d6lc00182c)
Supplement: d6lc00182c4.pdf [file d6lc00182c4.pdf]

## **Supplementary Information(SI)**

### **A contractile force measurement system for hiPSC-derived cardiac tissue integrated with an ultrathin, stretchable nanomesh**

Shogo Iwai, Daisuke Sasaki, Tetsutaro Kikuchi\*, Katsuhisa Matsuura, Kenjiro Fukuda, Sunghoon Lee\*, Tatsuya Shimizu, Takao Someya, and Shinjiro Umezu\*

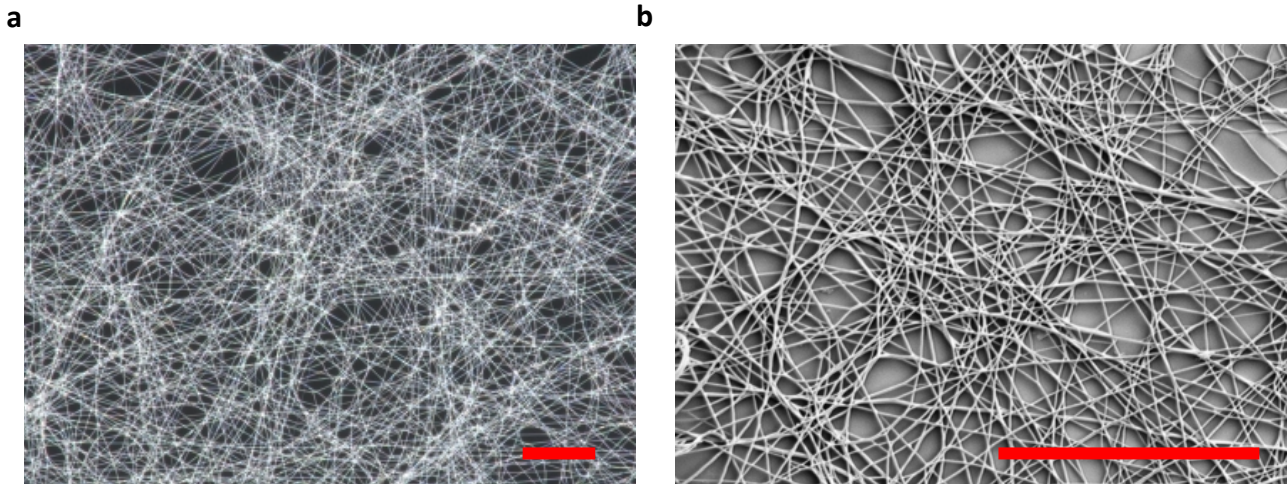

**Fig. S1** PU nanomesh image. (a) Microscope image. Scale bar: 50 $\mu$ m. (b) SEM image. Scale bar: 50 $\mu$ m.

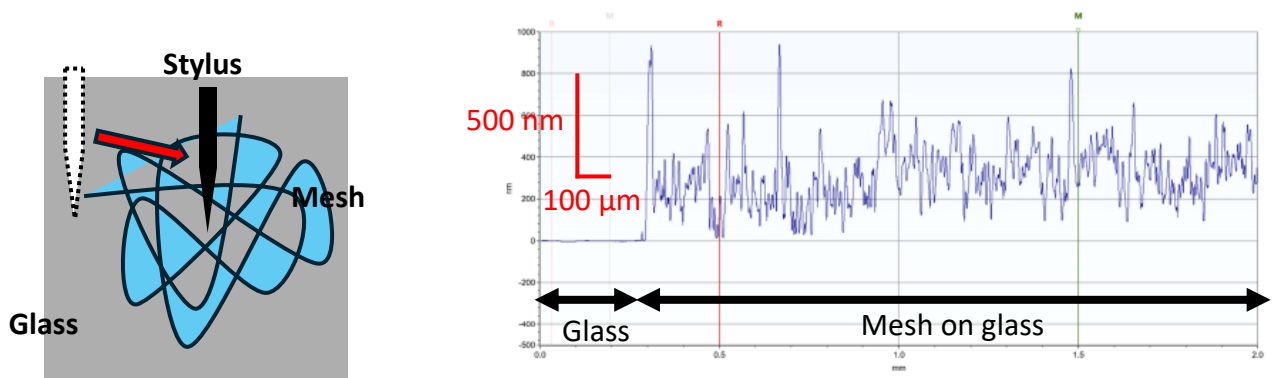

**Fig. S2** The thickness of the nanomesh was measured using a surface profilometer.

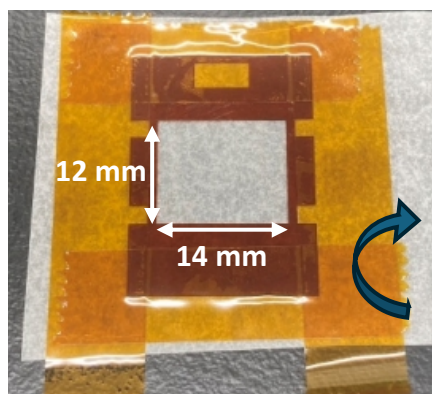

① The PI frame was attached to the nanomesh on cooking paper using Kapton tape.

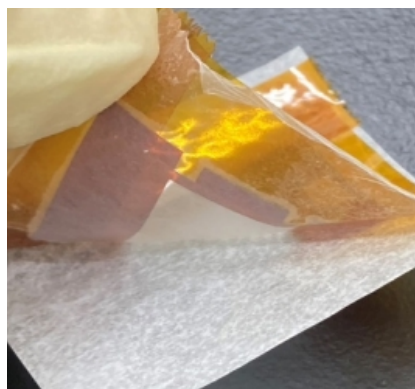

② Peeling off the tape simultaneously detached the nanomesh from the cooking paper.

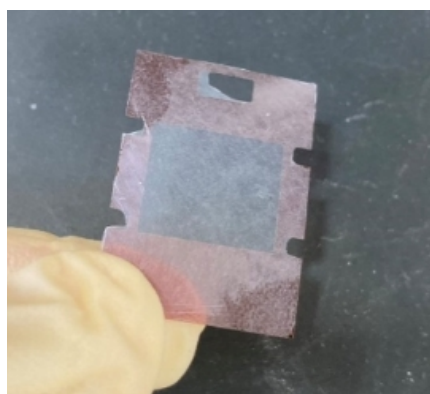

③ The Kapton tape was then removed.

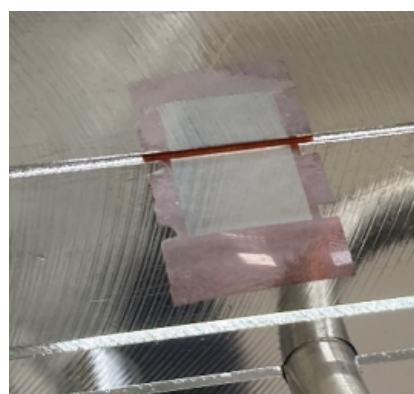

④ Adhesion between the PI frame and the nanomesh was reinforced by heat pressing.

**Fig. S3** The nanomesh was transferred onto a PI frame. Dimensions are indicated by arrows in the first panel and apply to all images.

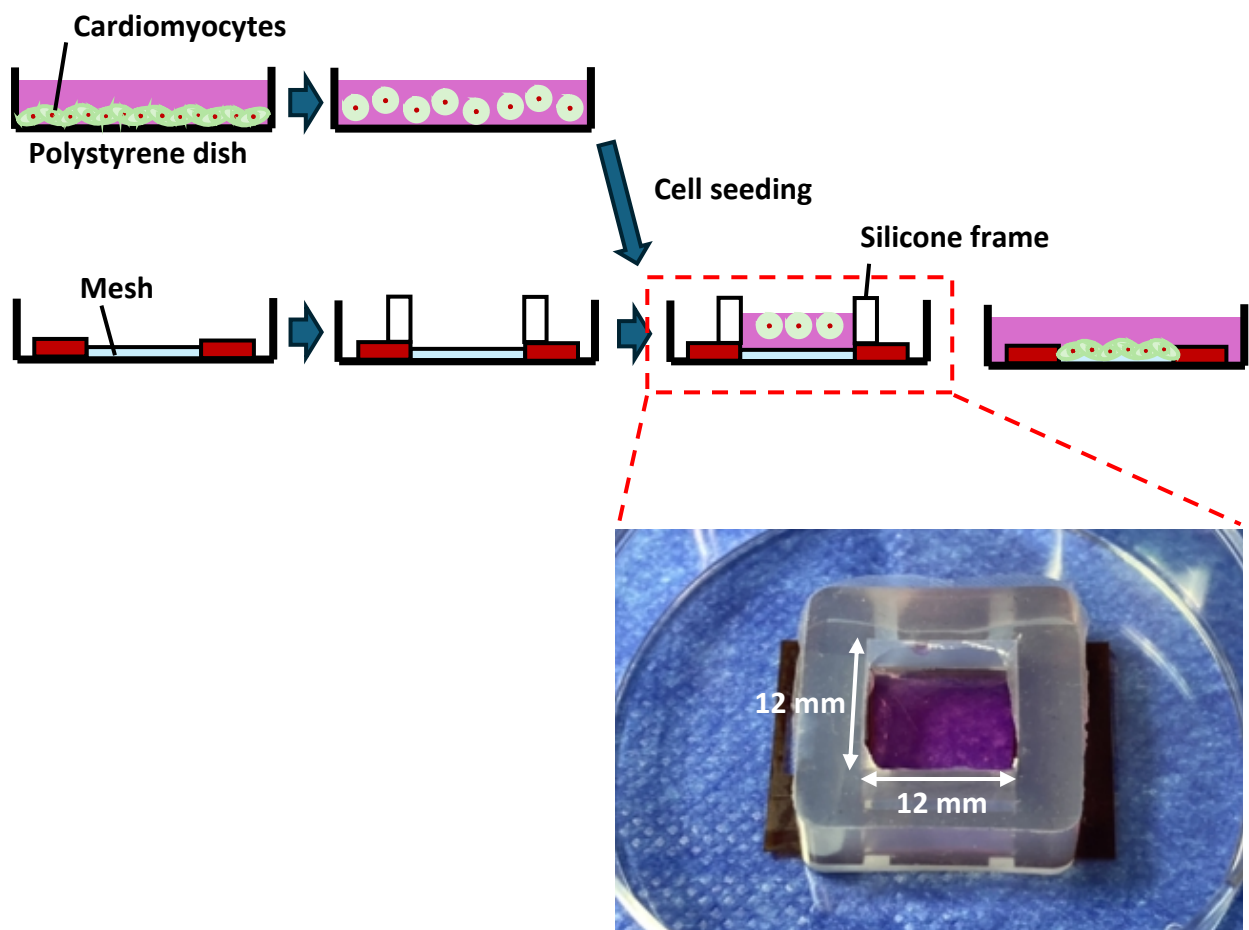

**Fig. S4** Cardiomyocytes were seeded onto the nanomesh.

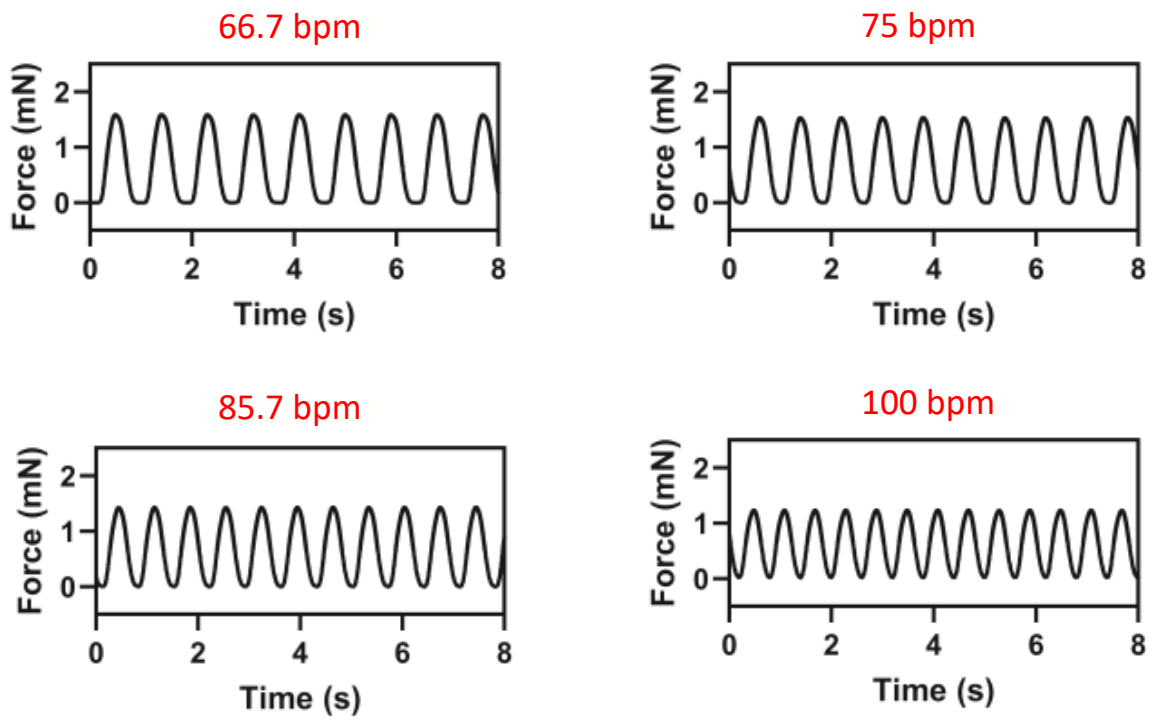

**Fig. S5** Electrical stimulation results at various frequencies

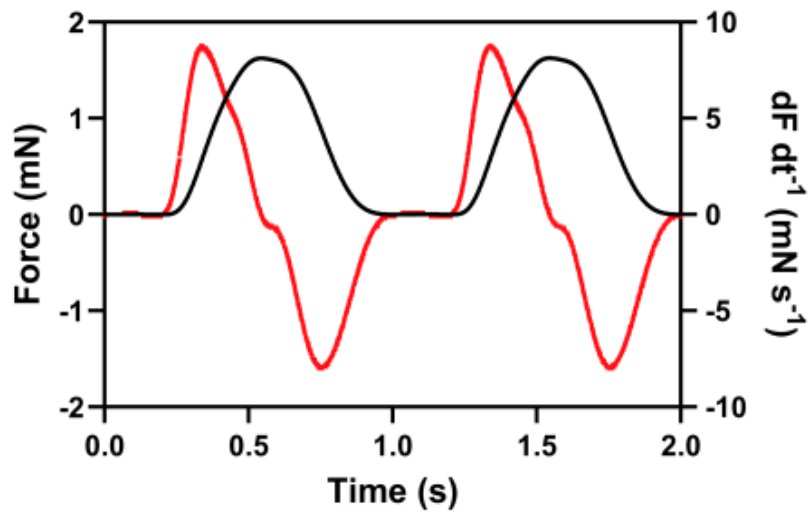

**Fig. S6** Contraction waveforms and their derivatives.  
Black: contraction waveform; Red: derivative waveform

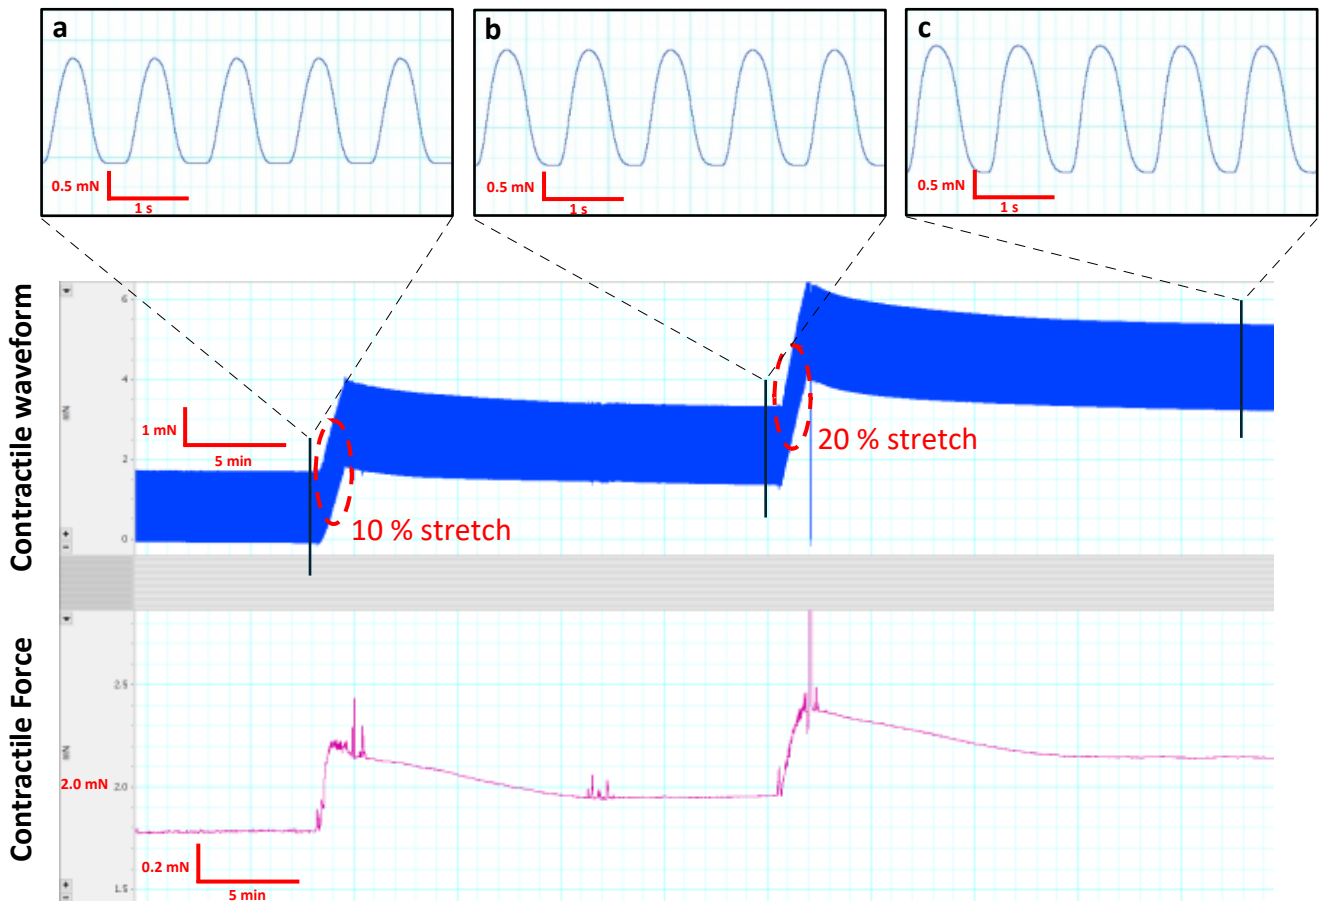

**Fig. S7** Mechanical stretch test

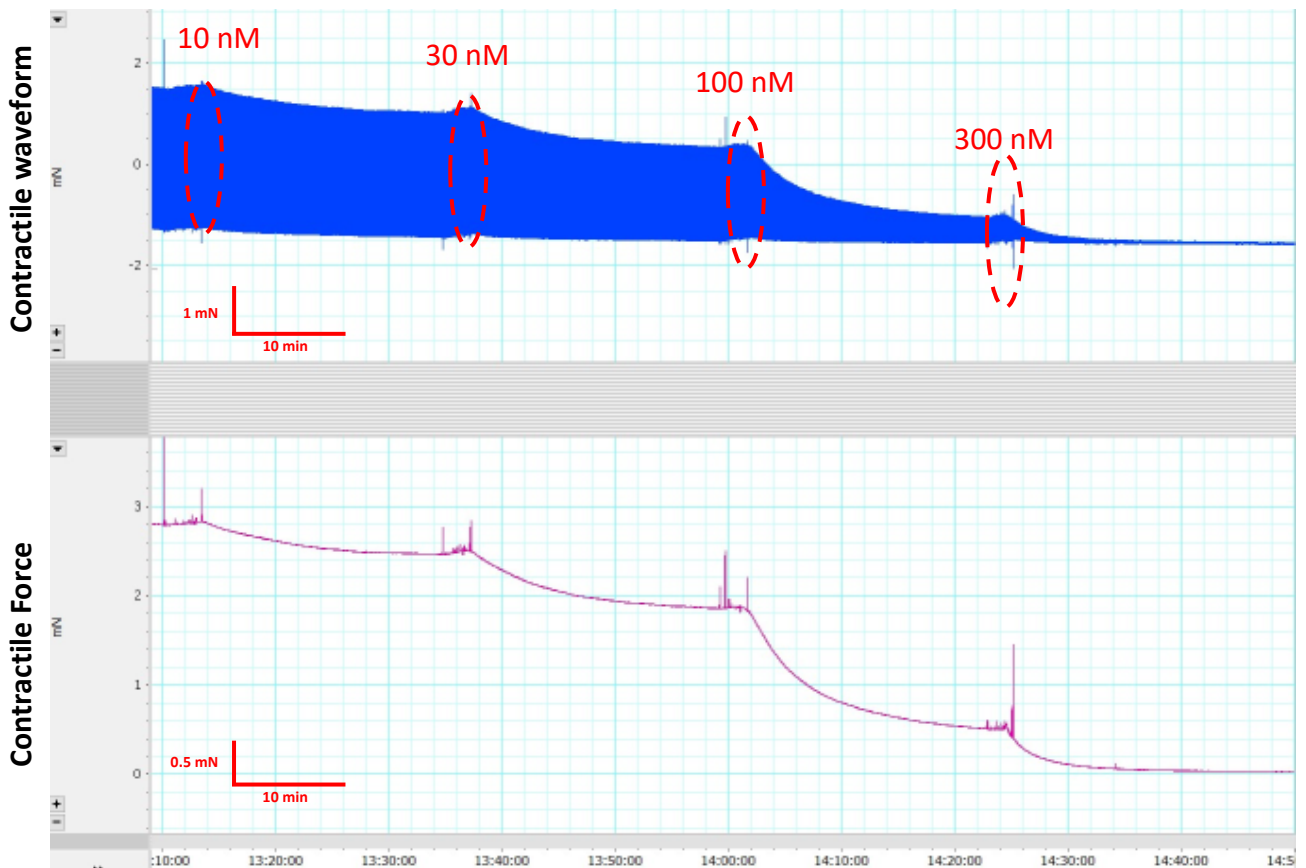

**Fig. S8** verapamil drug test

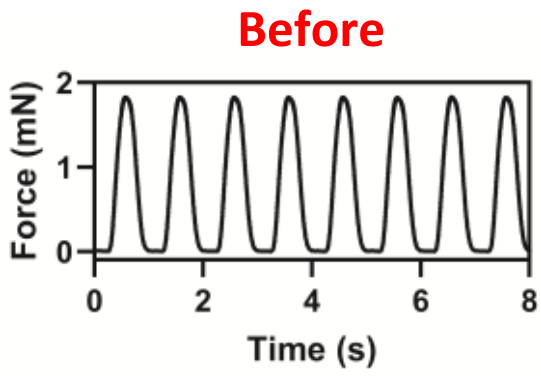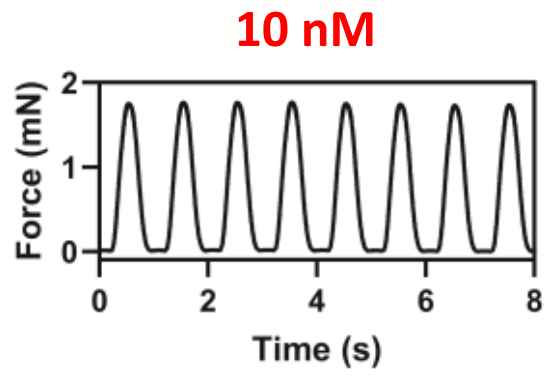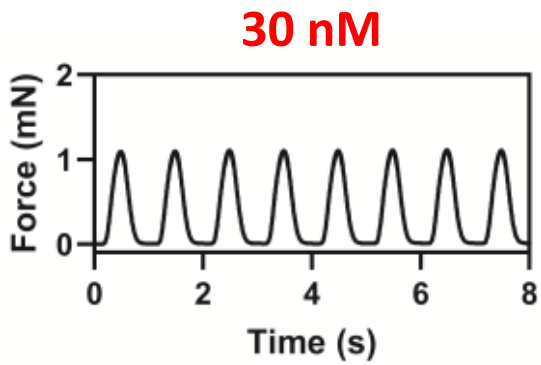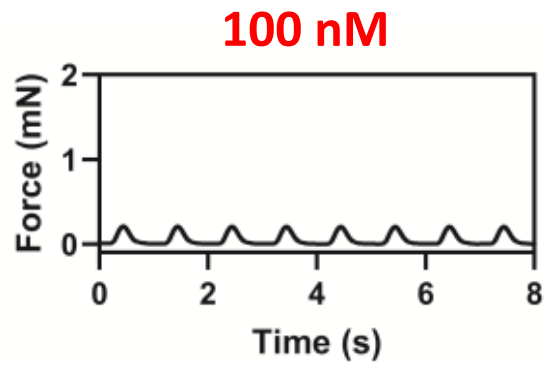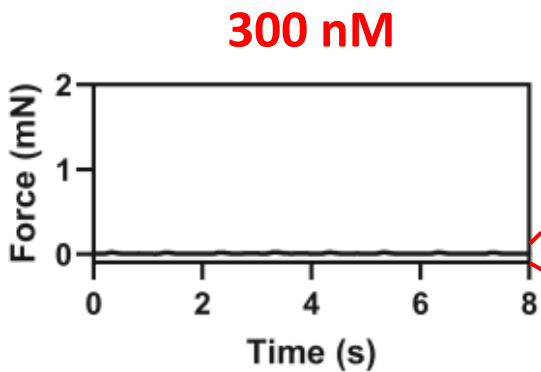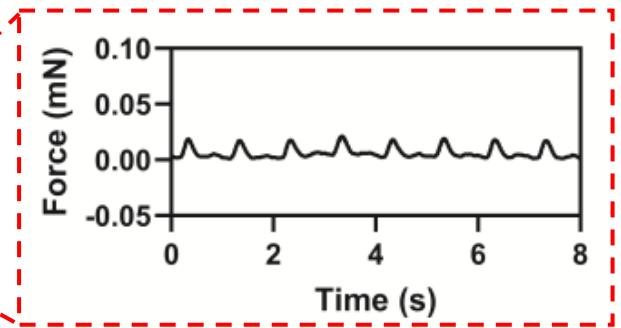

**Fig. S9** Waveforms following administration of verapamil

| Ref number        | Material                                | Thickness ( $\mu\text{m}$ ) | Stretchability (%) |
|-------------------|-----------------------------------------|-----------------------------|--------------------|
| 13                | Hydrogel mixture matrix (collagen base) | 300 ※ <sup>1</sup>          | 125~               |
| 14                | Hydrogel mixture matrix (collagen base) | 2000 ※ <sup>2</sup>         | 75~                |
| 15                | Hydrogel mixture matrix (collagen base) | N/A                         | 50~                |
| 16                | Hydrogel mixture matrix (collagen base) | N/A                         | 125~               |
| 17                | Hydrogel mixture matrix (collagen base) | 500 ※ <sup>1</sup>          | 70~                |
| 18                | Hydrogel mixture matrix (collagen base) | N/A                         | 31~                |
| 19                | Hydrogel mixture matrix (fibrin base)   | 500 ※ <sup>1</sup>          | 75~                |
| 20                | Hydrogel mixture matrix (fibrin base)   | 3000 ※ <sup>2</sup>         | 30~                |
| 21                | Hydrogel mixture matrix (fibrin base)   | N/A                         | 16~                |
| 22                | Hydrogel sheet (gelatin base)           | 200                         | 20~                |
| 23                | Hydrogel sheet (fibrin base)            | 1500                        | 20~                |
| 24                | PDMS                                    | 292.4                       | 20~                |
| <b>This study</b> | <b>PU nanomesh</b>                      | <b>~1</b>                   | <b>70</b>          |

※<sup>1</sup> For the hydrogel mixture matrix type, the tissue thickness is assumed to be equivalent to the substrate thickness.

※<sup>2</sup> The thickness of the hydrogel mixture matrix type is based on the thickness of the mold during the initial seeding stage.

**Table S1** quantitative comparison of substrate with previous.
